1 **Emergence of bluetongue virus serotype 3 in the Netherlands in September 2023**

2

3 Melle Holwerda<sup>1#\*</sup>, Inge M.G.A. Santman-Berends<sup>2\*</sup>, Frank Harders<sup>1</sup>, Marc Engelsma<sup>1</sup>,  
4 Rianka P.M. Vloet<sup>1</sup>, Eveline Dijkstra<sup>2</sup>, Rene G.P. van Gennip<sup>1</sup>, Maria H. Mars<sup>2</sup>, Marcel  
5 Spierenburg<sup>3</sup>, Lotte Roos<sup>2</sup>, René van den Brom<sup>2\*</sup>, Piet A. van Rijn<sup>1,4,\*</sup>

6 *Affiliations*

7 1: Wageningen Bioveterinary Research (WBVR), Department of Virology, P.O. Box 65, 8200  
8 AB Lelystad, The Netherlands

9 2: Royal GD, PO Box 9, 7400 AA Deventer, The Netherlands

10 3: Incident- and Crisiscentre (NVIC), Netherlands Food and Consumer Product Safety  
11 Authority (NVWA) , 3511 GG Utrecht, The Netherlands.

12 4: North-West University, Department of Biochemistry, Centre for Human Metabolomics,  
13 North-West University, Potchefstroom, South Africa

14 \* These authors contributed equally to this article

15 # corresponding author; email: [melle.holwerda@wur.nl](mailto:melle.holwerda@wur.nl). Phone numer: +31628949805.

16 **Word count abstract:** 148 words

17 **Word count text:** 3290 words

18 **Article summary line:** During September 2023, a novel serotype 3 Bluetongue virus (BTV)  
19 emerged in the Netherlands which affected sheep and cattle.

20 **Running title:** Emergence of BTV-3 in the Netherlands, 2023.

21 **Abstract**

22 Since 1998, WOAH-notifiable bluetongue virus (BTV) serotype 1, 2, 3, 4, 6, 8, 9, 11, and 16  
23 have been reported in Europe. In mid-August, 2006, a BTV-8 outbreak started in  
24 Northwestern Europe. The Netherlands was declared BT-free again in February 2012 and  
25 annual monitoring demonstrated BT-freedom up to 2023. On September 3<sup>rd</sup> 2023, clinical  
26 manifestations in sheep typical for BT were notified to the Dutch Food and Product Safety  
27 Consumer Authority. Laboratory diagnosis confirmed BTV-infection on September 6 and the  
28 first notifications of clinical signs in cattle were also reported. Two days later, the virus was  
29 identified as serotype 3 by whole genome sequencing. Clinical signs were like these of BTV-8  
30 outbreak and were most serious in sheep. Retrospective analysis revealed no earlier  
31 circulation of BTV. It was concluded that the BTV-3 outbreak was detected shortly after  
32 introduction, while the virus source and route of introduction remains unknown.

33

34 Keywords: bluetongue; sheep; cattle; serotyping; genotyping

---

35

36

37 **Introduction**

38 Bluetongue virus (BTV) is an arthropod-borne virus, which can cause clinical disease and  
39 mortality in ruminants. Exclusively, all types of ruminants are susceptible for infection with  
40 BTV, while infections in new world camelids have incidentally also been described (1–3).  
41 Other species including humans are not susceptible for infection, indicating that BTV is not a  
42 zoonosis.

43 BTV is transmitted by certain species of *Culicoides* midges and was historically only present  
44 between latitudes 35°S and 50°N (4,5). The BTV serogroup consists of more than thirty  
45 serotypes, which show no or limited cross-protection between serotypes. Since 1998, several  
46 BTV serotypes (1, 2, 3, 4, 6, 8, 9, 11 and 16) have been present in Europe and the  
47 Mediterranean Basin (6). In 2006, bluetongue virus serotype 8 (BTV-8) emerged in  
48 northwestern Europe for the first time, and the Netherlands was the first country where the  
49 infection was detected (7,8). After a major BTV-8 outbreak in 2006 and 2007, in 2008 an  
50 emergency BTV-8 vaccine became available (9,10) and many cattle herds and small ruminant  
51 flocks participated in the voluntary vaccination program that was implemented by the Dutch  
52 government (11). This resulted in a dramatic decline in the number of clinical notifications at  
53 the Dutch Food and Consumer Product Safety Authority (NVWA) in 2008. At the end of  
54 2008, over 80% of the susceptible host population tested positive for antibodies due to natural  
55 infection or vaccination. From 2009 on, no new infections were observed and after three years  
56 of screening of possible BTV circulation, the Netherlands regained its official BT-free status  
57 in February 2012. Since then, this disease-free status was monitored annually according to EU  
58 regulation 1108/2008/EC and was confirmed without interruption up to December 2022.  
59 However, based on the risk of introduction of BTV-8 from neighboring countries, vaccination  
60 was allowed and therefore some farmers still vaccinated their animals for serotype 8.

61 On 3 September 2023, clinical signs in sheep indicative for BT were notified to the authorities  
62 by two veterinary practices located at the middle of the Netherlands at the same time. This  
63 paper describes the actions that were taken after the first notified clinical case was confirmed  
64 as infection with BTV.

65

## 66 **Methods**

### 67 *Sheep and cattle population in the Netherlands and clinical examination*

68 In 2022, around 1,080,631 sheep and 1,596,894 dairy cattle (>2 year) were present at in  
69 approximately 31,000 sheep farms and 14,000 cattle herds in the Netherlands (12,13). Farms  
70 with a suspicion of BT that notified to the authorities were visited by a veterinary team with  
71 specialists in (small) ruminant health to review reported clinical symptoms and to take  
72 samples for BTV diagnostics. Additionally, several farms were visited by GD that were  
73 already confirmed as BTV-positive, and sheep and cattle on these farms were clinically  
74 examined and the clinical signs were described.

### 75 *Realtime PCR*

76 The real-time PCR was performed according to the protocol of van Rijn *et al.* (2012) (14).  
77 Briefly, viral RNA was extracted from 200 µl of EDTA-blood using the Magnapure 96  
78 robotic machine (Roche, Basel, Switzerland) in combination with the MagnaPure 96 DNA  
79 and viral NA small volume kit (Roche). For RT-PCR, five microliter of elution was loaded  
80 into a 96-well plate with the Light Cycler RNA master hybridization Probe kit (Roche) and  
81 amplification was performed in a Lightcycler 480 machine (Roche) using integrated software  
82 version 1.5.1.

### 83 *Competition ELISA on individual samples*

84 The competition ELISA was performed with the ID screen bluetongue competition enzyme-  
85 linked immunosorbent assay (ELISA) according to the manufacturers protocol (Innovative  
86 Diagnostics, Montpellier, France). Optical density was measured at 450 nanometer using a  
87 Multiskan FC machine (Thermo Scientific, USA) in combination with Mikrowin (software  
88 version 5.09) and % blocking was calculated using the positive and negative control supplied  
89 with the kit.

### 90 *SISPA-based whole genome Sequencing using Oxford Nanopore Technology*

91 RNA extracted from EDTA-blood was applied to amplify the viral genomic segments using a  
92 Sequence Independent Single Primer Amplification (SISPA) approach. Initial first strand  
93 cDNA synthesis was performed with five µl of RNA in combination with Superscript III  
94 (Thermo Fischer) according to manufacturer's protocol using 2 uM of 5'-GTT TCC CAG  
95 TCA CGA TA N9- 3'. The mixture was incubated for 3 minutes at 95 °C to denature viral  
96 double-stranded RNA followed by cooling on ice. The remaining ingredients were added to

97 the reaction and incubated at 25 °C for 5 minutes, 42 °C for 50 minutes, 70 °C for 15 minutes  
98 and stored at 4 °C. Second strand synthesis was performed using Sequenase (Thermo Fischer)  
99 according to manufacturer's protocol. Amplification of the products was performed using Q5  
100 high-fidelity DNA polymerase (New England Biolabs, USA) according to the guidelines of  
101 the producer with 2 µM of 5'-GTT TCC CAG TCA CGA TA- 3'. The following cycle  
102 conditions were used: 94 °C for 4 minutes, 68 °C for 5 minutes following 35 cycles of 94 °C  
103 for 30 seconds, 50 °C for 1 minute, 68 °C for 3 minutes, followed by 68 °C for 5 minutes and  
104 cooldown to 10 °C. To enhance the number of viral reads, a size selection of >200 base pairs  
105 was performed using the SPRIselected beads (Beckman-Coulter, USA) with a ratio of 0.8.  
106 From each individual sample was ~150 nanogram barcoded using the Native barcoding v14-  
107 kit (SQK-NBD114.96, Oxford Nanopore technologies, United Kingdom) according to  
108 manufacturer's protocol. Nanopore sequencing was performed on an Oxford Nanopore  
109 Promethion Flow Cell R10 (M version). To align the reads, Minimap 2(V2.26) was applied  
110 against a custom BTV reference database to construct a draft genome using reference-based  
111 mapping (15). The sequences were deposited on NCBI on 26 September 2023 with accession  
112 numbers OR603992-OR604001.

113 Phylogenetic analysis of the obtained genome sequences was performed for each genome  
114 segment separately with the top-15 BLAST (NCBI GenBank accession date September 11,  
115 2023) results included in the analysis. In addition, Seg-2 reference strains and a selected  
116 number of closely related BTV-3 strains were added in the phylogenetic analysis (16). The  
117 sequences were aligned using MAFFT v7.475 (17) followed by reconstructing the phylogeny  
118 using maximum likelihood (ML) analysis with IQ-TREE software v2.0.3 (18) and 1,000  
119 ultrafast bootstrap replicates (19), and visualizing the ML tree using the R package ggtree  
120 (20).

#### 121 *Bulk tank milk ELISA*

122 For the retrospective analysis of BTV-antibodies in bulk milk, the indirect ELISA based on  
123 the recombinant VP7 protein (ID Screen ® Bluetongue Milk Indirect, Innovative Diagnostics,  
124 Montpellier, France) was used according to manufacturer's protocol. This ELISA has been  
125 validated in 2007 in the Netherlands (21). To study the herd prevalence of Bluetongue  
126 serotype 3 infections in 2023, the cut off was used as prescribed in the manual: S/P≤30% is  
127 considered negative, 30>S/P%≤40% is considered doubtful and S/P>40% is considered  
128 positive.

129 *Retrospective study*

130 To investigate whether the initial outbreak started in the area of the four BTV-3 confirmed  
131 sheep farms in the middle of the Netherlands, bulk tank milk samples from cattle from all  
132 over the Netherlands that were submitted for routine testing in August were screened for the  
133 presence of BTV-antibodies. Royal GD coordinates a national monitoring program for which  
134 approximately 90% (N=12,000) of the Dutch dairy cattle farmers submit bulk tank milk  
135 samples on a monthly base. To gain insight into the presence of BTV-antibodies in Dutch  
136 dairy herds and thereby indicating an earlier infection than September 2023, thousand milk-  
137 samples from all over the Netherlands were tested.

138 Identification and registration data was used (RVO, Assen the Netherlands) to enable  
139 selection of dairy herds that did not purchase any cattle during the vector active season in  
140 2023 (from April on) and that only housed Dutch bred animals (N=7,900). The Netherlands is  
141 divided into twenty compartments as proposed in Commission Decision 2005/393/EC and the  
142 1,000 bulk milk samples were randomly selected stratified to the twenty compartments. This  
143 resulted in approximately fifty sampled herds which enabled a prevalence estimate with a  
144 precision of 14% and 95% confidence. On 11 September the first preliminary results were  
145 presented to the government. On 13 September additional data on vaccination purchases that  
146 are registered in the MediRund database (ZuivelNL, the Hague the Netherlands) became  
147 available and were combined with the results of the bulk milk screening.

148 *Map generation*

149 The sheep and cattle density are graphically displayed in thematic maps of the Netherlands,  
150 with the density presented at two-digit postal code level. BTV-confirmed clinical notifications  
151 of sheep and cattle cases are presented as dots in the respective maps until 29/09/2023. All  
152 maps are generated using Stata version 17<sup>®</sup> (Statacorp, 2021).

153

154

155 **Results**

156 **Timeline (Figure 1)**

157 On 3 and 4 September 2023, NVWA was notified of clinical signs that were indicative for  
158 BTV infection at five sheep farms in the middle of the Netherlands near the “Loosdrechtse  
159 plassen”. Flocks were visited by a team of veterinary specialists, where serum and EDTA-  
160 blood were collected from sheep which were send to the Dutch National Veterinary Reference  
161 Laboratory for BTV, Wageningen Bioveterinary Research (WBVR).

162 On 6 September, BTV infections was confirmed by real-time PCR and competition ELISA.  
163 Of the seven blood samples taken from five sheep farms, six samples from four different  
164 farms tested PCR-positive with Ct-values ranging from 23 to 31. Five out of six PCR-positive  
165 sheep also tested positive for antibodies against BT with blocking percentages >90%.  
166 Differential diagnosis for BTV include foot-and-mouth disease (FMDV), therefore, the  
167 samples were also tested with an inhouse developed and validated PCR-test for FMDV, but  
168 no Ct-values were measured. Results were immediately reported to the Dutch Ministry of  
169 Agriculture, Nature, and Food quality. Additionally, new samples were requested for  
170 confirmation and for shipment to the European Reference Laboratory for BTV, Animal  
171 Health Research Center CISA-INIA in Madrid, Spain. In addition, whole genome sequencing  
172 was initiated on the PCR-positive samples using Oxford Nanopore Technology by WBVR.

173 The first suspicion of BTV in cattle was notified to the NVWA on September 6.

174 On 8 September, three blood samples of sheep sampled at three unrelated farms showed  
175 sufficient coverage per nucleotide, ranging from 30 to 2570, (**Table 1**) to reliably determine  
176 contig sequences of all ten genome segments for three samples. Contig sequences derived  
177 from individual samples were 100% identical. Contigs represented full length sequences of  
178 genome segment 1-9 (Seg-1 to Seg-9), including the 5' and 3'-termini. Contigs of Seg-10  
179 were incomplete and additionally completed by sanger sequencing, except for the ultimate 22  
180 nucleotides at the 3'-end corresponding to the amplification primer. Full length sequences of  
181 Seg-1 to Seg-10 are submitted to the NCBI Genbank accession numbers OR603992-  
182 OR604001. Phylogenetic analysis of Seg-2 encoding the serotype dominant VP2-protein with  
183 the prototypic isolates of notifiable BTV serotypes 1-24 identified the causative agent as BTV  
184 serotype 3. As can be seen in **Figure 2A**, phylogenetic clustering was also observed with  
185 serotype 13 and 16, confirming previous genetic analysis (22). Based on the phylogenetic  
186 tree, WBVR announced that genotyping revealed that the BTV outbreak was caused by

187 serotype 3, due to the high homology with known serotype 3 isolates. Detailed phylogenetic  
188 analysis showed a close relationship with Seg-2 from recent Italian and Tunisian BTV-3  
189 isolates (**Figure 2B**).

190 Phylogenetic analyses for other individual genome segments of BTV-3/NET2023 did not  
191 show a clue of a particular ancestor but the closest identity (>97%) to genome segments of  
192 various BTVs (**Table 2**).

193

194 On 11 September, newly collected serum and EDTA-blood samples from the four initial  
195 farms were subjected for confirmation and also send towards the EURL for confirmation and  
196 serotyping by serotype-specific real-time PCR tests.

197 On 14 September, the EURL confirmed the results based on the WOAHA-recommended PCR-  
198 test targeting seg-10. Serotype-specific real-time PCR tests specific for serotype 3, 4 and 8  
199 clearly confirmed serotype 3. This result was immediately forwarded to the Ministry of LNV  
200 and NVWA.

201 On 19 September, samples of the first suspicion of BTV-like signs in a goat was reported. In  
202 addition, virus isolation of BTV-3/NET2023 from EDTA-blood derived from sheep from the  
203 initial four farms was shown to be successful on KC-cells (23) .

#### 204 Clinical manifestation in sheep and cattle.

205 Sheep in flocks that were among the first ones to report clinical signs, showed signs of fever,  
206 lethargy, hypersalivation, ulcerations and erosions of the oral and nasal mucosal membranes,  
207 facial oedema, and lesions of the coronary band, lameness and mortality (**Figure 3**). In the  
208 days after the initial confirmation of the outbreak, clinical signs were also reported in cattle.  
209 Clinical signs observed in cattle consisted of fever, apathy, conjunctivitis, nasal discharge,  
210 erosions and crust formation on lips and nostrils, ulcerations and erosions of oral mucosa,  
211 oedema of the nose, coronitis and superficial necrosis of teats.

212 After the start of the outbreak, the number of notifications increased rapidly in both sheep  
213 flocks and cattle herds. The initial cases were four sheep farms. One week later (week 36), in  
214 total 25 sheep and 12 cattle notifications were confirmed BTV-3/NET2023 positive as  
215 confirmed by PCR-testing. In the second week (week 37) the total number of cases increased  
216 to 18 in sheep flocks and 55 in cattle herds. In the third week (week 38), the total number of  
217 cases increased to 324 in sheep flocks and 61 in cattle herds. An geographical overview of  
218 the potential index cases and the spread of BTV-confirmed suspicions is shown in **Figure 4**.



219 Retrospective study

220 To investigate whether the initial outbreak started at the four farms in the middle of the  
221 Netherlands, bulk tank milk samples from cattle farms submitted for routine testing in August  
222 were screened for BTV-antibodies. Antibody positive results were found in 2.8% (95% CI:  
223 1.9-4.1%) of the bulk tank milk samples. Of the 991 bulk tank milk samples, 955 tested  
224 negative, eight tested doubtful and 28 tested positive. However, 24 out of 36 bulk tank milk  
225 samples with doubtful or positive results (58%) were from farms with a proven history of  
226 vaccination against BTV-8. BTV antibodies that could not be linked to a recorded history of  
227 vaccination against BT were found in 12 out of 991 bulk tank milk samples. These 12 positive  
228 samples were however not clustered and showed a somewhat similar distribution as the  
229 positive samples that originated from vaccinated herds (**Figure 5**). Altogether, these results  
230 show that there was no area with a high seroprevalence for BTV antibodies in August 2023  
231 and no BTV-specific antibodies were found in the region where the initial notifications of BTV  
232 were made. Therefore, the four index cases where bluetongue was initially observed belong  
233 more likely to one of the first affected farms.

234

235 **Discussion**

236 This manuscript describes the actions after the emergence of a novel BTV-3 strain in sheep  
237 and cattle in the Netherlands. Initially, sheep from four farms located in the middle of the  
238 Netherlands showed clinical signs of fever, lethargy, hypersalivation, ulcerations, erosions of  
239 the oral and nasal mucosal membranes or sudden death. These sheep were tested positive by  
240 real-time PCR and all but one showed seroconversion by competition ELISA. That one sheep  
241 was acutely infected and was still negative for BTV antibodies. Whole genome sequencing  
242 using Oxford Nanopore Technology has shown that the full viral genome sequence can be  
243 determined quickly. The generated nucleotide sequence of segment 2 aligns with other  
244 sequences from BTV serotype 3. We investigated the epidemiological situation the month  
245 before the first cases were found by retrospectively testing of bulk tank milk, however, no  
246 high seroprevalence was measured nor seropositive samples were found in the region where the  
247 initial cases were detected, indicating that the index cases of the initial four farms could be  
248 considered as one of the first BTV infections. This was in agreement with the findings of  
249 retrospective analysis of 1003 sheep sera from 89 flocks which indicated 3,4% herd  
250 prevalence in August (data not shown). Currently, on 29 September 2023, 380 farms or  
251 holdings have been confirmed positive by real-time PCR.

252 Early detection of diseases by clinical diagnosis remains challenging, especially for  
253 unpredicted non-endemic diseases. Like for bluetongue, the condition knows a wide and non-  
254 specific spectrum of clinical manifestations as fever, hypersalivation, lameness, edemas and  
255 sudden death. The variation in disease severity of bluetongue in sheep and cattle overlaps with  
256 a number of endemic infections. For instance, diseases like orf, dermatophilosis,  
257 haemonchosis, pasteurellosis, (strawberry) footrot and photosensitisation are differentially  
258 diagnostic relevant endemic conditions in sheep. Malignant catarrhal fever and  
259 photosensitisation can cause similar signs as BT in cattle (24,25). Awareness of BTV-like  
260 symptoms among veterinarians is also of great importance for other notifiable diseases like  
261 FMD, peste des petits ruminants (PPR), sheep and goat pox (SGP), and emerging  
262 haemorrhagic disease (EHD) and should, in case of suspicion, be notified to the official  
263 authorities. During an outbreak of BTV, publicity creates increased awareness among  
264 veterinarians and farmers. This might result in an increase of false notifications of bluetongue  
265 based on the, not so specific, clinical signs. Therefore, education of veterinarians and  
266 livestock farmers about the clinical manifestations of BT and other diseases remains  
267 important. In particular of notifiable diseases of which countries are free of for a longer time

268 since many veterinarians may have not seen the clinical picture in real life. Only laboratory  
269 diagnosis can and should rapidly differentiate between these notifiable diseases to support  
270 clinical diagnosis. Nevertheless, in this outbreak, this emerging disease has been detected  
271 successfully in an early stage.

272 The speed of the onward spread of BTV after the initial emergence clearly shows that  
273 indigenous *Culicoides* in the Netherlands are vector competent to transmit the causative BTV-  
274 3/NET2023. Since the predominantly Afro-Asiatic vector of BTV, *C. imicola*, is not present  
275 in Northwestern Europe, and the BTV-6 outbreak in the Netherlands in 2008 showed that the  
276 outbreak dies out when indigenous *Culicoides* are unable to effectively transmit the virus,  
277 BTV-3/NET2023 is after BTV-8/NET2006 the second BTV variant successfully transmitted  
278 by Northwestern indigenous midge species (26). Previously, it has been shown that BTV-  
279 8/NET2006 is transmitted by indigenous midge species of the *Culicoides obsoletus* complex,  
280 such as *C. obsoletus*, *C. scoticus*, *C. dewulfi* and *C. chiopterus* (27–29). Entomological  
281 research is needed to identify the midge species involved in transmission of BTV-3/NET2023.

282 Immediate arising questions are the geographical origin and route of introduction of BTV-3  
283 into the Netherlands. Phylogenetic analysis of Seg-2 clearly shows clustering with other Seg-2  
284 sequences of serotype 3, including geographically close variants of BTV-3. However,  
285 sequences of other genome segments do not show any undoubted high homology with one of  
286 the BTV-3 variants. Therefore, tracing back where the virus geographically is coming from is  
287 difficult to determine. Furthermore, the segmented genome of BTV is the basis for exchange  
288 of genome segments known as reassortment, including antigenic shift. This viral trait hampers  
289 the unravelling of the geographical source of BTV-3/NET2023. It can be speculated that the  
290 virus was introduced over a long distance as neighboring countries Belgium and Germany  
291 recently obtained the BTV-free status since June 2023. In conclusion, no clue can be given  
292 upon the source and route of introduction of BTV-3/NET2023. However, yearly monitoring,  
293 and the in this paper presented retrospective study showed that virus circulation only recently  
294 started in the currently affected area.

295 In conclusion, after a decade of BT-freedom, BTV-3 emerged in the Netherlands causing  
296 clinical signs and mortality in sheep and cattle. The causative virus is designated BTV-  
297 3/NET2023. The source, geographical origin, and introduction route of BTV-3/NET2023 are  
298 unknown but virus circulation has recently started in the currently affected area. Clearly,

299 BTV-3/NET2023 is transmitted by indigenous Dutch midges but the involved midge species  
300 is/are not identified yet.

301

### 302 **Acknowledgements**

303 We would like to thank the veterinary practitioners from Dierenartsenpraktijk Gorter and  
304 Dierenkliniek Amstel, Vecht en Venen. Additionally, we want to thank all the laboratory  
305 personnel at WBVR and Royal GD and all veterinarians that conducted the herd visits for  
306 their laborious work. This study is financially supported by the Ministry of Agriculture,  
307 Nature and Food quality with projectnumber: 1600002757 VZVD.

308

### 309 **Biosketch**

310 Melle Holwerda is head of the national reference laboratory for viral veterinary vector-borne  
311 diseases at WBVR. Inge Santman-Berends works as head of the department of epidemiology  
312 at the Royal GD.

313

314 **References**

- 315 1. Henrich M, Reinacher M, Hamann HP. Lethal bluetongue virus infection in an alpaca.  
316 *Veterinary Record*. 2007 Dec 1;161(22):764.
- 317 2. Gilles Meyer, Caroline Lacroux, Sébastien Léger, Sokunthea Top, Katel Goyeau,  
318 Martine Deplanche, et al. Lethal Bluetongue virus Serotype 1 infection in Llamas.  
319 *Emerg Infect Dis*. 2009 Apr;15(4):607–8.
- 320 3. Ortega J, Crossley B, Dechant JE, Drew CP, Maclachlan NJ. Fatal Bluetongue virus  
321 infection in an alpaca (*Vicugna pacos*) in California. *J Vet Diagn Invest* [Internet].  
322 2010;22:134–6. Available from: <http://www>.
- 323 4. Zhang N, MacLachlan NJ, Bonneau KR, Zhu J, Li Z, Zhang K, et al. Identification of  
324 seven serotypes of bluetongue virus from the People’s Republic of China. *Vet Rec*.  
325 1999;145(15):427–9.
- 326 5. Mellor PS, Carpenter S, Harrup L, Baylis M, Mertens PPC. Bluetongue in Europe and  
327 the Mediterranean Basin: History of occurrence prior to 2006. *Prev Vet Med*. 2008 Oct  
328 15;87(1–2):4–20.
- 329 6. Lundervold M, Milner-Gulland EJ, O’callaghan CJ, Hamblin C. First evidence of  
330 bluetongue virus in Kazakhstan. *Vet Microbiol*. 2003;92:281–7.
- 331 7. Van Wuijckhuise L, Dercksen D, Muskens J, Buijn de J, Scheepers M, Vrouwenraets R.  
332 Bluetongue in The Netherlands; description of the first clinical cases and differential  
333 diagnosis. Common symptoms just a little different and in too many herds. *Tijdschr*  
334 *Diergeneeskd*. 2006 Sep 15;15(131):649–54.
- 335 8. Elbers ARW, Backx A, Meroc E, Gerbier G, Staubach C, Hendrickx G, et al. Field  
336 observations during the bluetongue serotype 8 epidemic in 2006. I. Detection of first  
337 outbreaks and clinical signs in sheep and cattle in Belgium, France and the  
338 Netherlands. *Prev Vet Med*. 2008 Oct 15;87(1–2):21–30.
- 339 9. Wäckerlin R, Eschbaumer M, König P, Hoffmann B, Beer M. Evaluation of humoral  
340 response and protective efficacy of three inactivated vaccines against bluetongue virus  
341 serotype 8 one year after vaccination of sheep and cattle. *Vaccine*. 2010 Jun  
342 17;28(27):4348–55.
- 343 10. Oura CAL, Edwards L, Batten CA. Evaluation of the humoral immune response in  
344 adult dairy cattle three years after vaccination with a bluetongue serotype 8 inactivated  
345 vaccine. *Vaccine*. 2012 Jan 5;30(2):112–5.
- 346 11. Elbers ARW, de Koeijer AA, Scolamacchia F, van Rijn PA. Questionnaire survey  
347 about the motives of commercial livestock farmers and hobby holders to vaccinate their

- 348 animals against Bluetongue virus serotype 8 in 2008-2009 in the Netherlands. *Vaccine*.  
349 2010 Mar 16;28(13):2473–81.
- 350 12. Dijkstra E, Vellema P, Peterson K, Ter Bogt Kappert C, Dijkman R, Harkema L, et al.  
351 Monitoring and Surveillance of Small Ruminant Health in The Netherlands. *Pathogens*.  
352 2022 Jun 1;11(6).
- 353 13. Santman-Berends IMGA, Brouwer-Middelesch H, Van Wuijckhuise L, de Bont-  
354 Smolenaars AJG, Van Schaik G. Surveillance of cattle health in the Netherlands:  
355 Monitoring trends and developments using routinely collected cattle census data. *Prev  
356 Vet Med*. 2016 Nov 1;134:103–12.
- 357 14. van Rijn PA, Heutink RG, Boonstra J, Kramps HA, van Gennip RGP. Sustained high-  
358 throughput polymerase chain reaction diagnostics during the European epidemic of  
359 Bluetongue virus serotype 8. *Journal of Veterinary Diagnostic Investigation*. 2012  
360 May;24(3):469–78.
- 361 15. Li H. Minimap2: Pairwise alignment for nucleotide sequences. *Bioinformatics*. 2018  
362 Sep 15;34(18):3094–100.
- 363 16. Maan S, Maan NS, Samuel AR, Rao S, Attoui H, Mertens PPC. Analysis and  
364 phylogenetic comparisons of full-length VP2 genes of the 24 bluetongue virus  
365 serotypes. *Journal of General Virology*. 2007 Feb;88(2):621–30.
- 366 17. Katoh K, Standley DM. MAFFT multiple sequence alignment software version 7:  
367 Improvements in performance and usability. *Mol Biol Evol*. 2013 Apr;30(4):772–80.
- 368 18. Nguyen LT, Schmidt HA, Von Haeseler A, Minh BQ. IQ-TREE: A fast and effective  
369 stochastic algorithm for estimating maximum-likelihood phylogenies. *Mol Biol Evol*.  
370 2015 Jan 1;32(1):268–74.
- 371 19. Thi Hoang D, Chernomor O, von Haeseler A, Quang Minh B, Sy Vinh L, Rosenberg  
372 MS. UFBoot2: Improving the Ultrafast Bootstrap Approximation. *Mol Biol Evol*  
373 [Internet]. 2017;35(2):518–22. Available from: <http://www.iqtree.org>.
- 374 20. Yu G, Smith DK, Zhu H, Guan Y, Lam TTY. ggtree: an r package for visualization and  
375 annotation of phylogenetic trees with their covariates and other associated data.  
376 *Methods Ecol Evol*. 2017 Jan 1;8(1):28–36.
- 377 21. Mars MH, van Maanen C, Vellema P, Kramps JA, van Rijn PA. Evaluation of an  
378 indirect ELISA for detection of antibodies in bulk milk against bluetongue virus  
379 infections in the Netherlands. *Vet Microbiol*. 2010 Dec 15;146(3–4):209–14.
- 380 22. van Rijn PA. Prospects of Next-Generation Vaccines for Bluetongue. *Front Vet Sci*.  
381 2019;6(November).

- 382 23. Wechsler SJ, McHolland LE, Tabachnick WJ. Cell Lines from *Culicoides variipennis*  
383 (Diptera: Ceratopogonidae) Support Replication of Bluetongue Virus. *J Invertebr*  
384 *Pathol.* 1989;54:385–93.
- 385 24. Williamson S, Woodger N, Darpel K. Differential diagnosis of bluetongue in cattle and  
386 sheep. *In Pract.* 2008;30(5):242–51.
- 387 25. Dercksen D, Lewis C. Bluetongue virus serotype 8 in sheep and cattle: A clinical  
388 update. *In Pract.* 2007;29(6):314–8.
- 389 26. Mellor PS, Boorman J, Baylis M. CULICOIDES BITING MIDGES: Their Role as  
390 Arbovirus Vectors [Internet]. Vol. 45, *Annu. Rev. Entomol.* 2000. Available from:  
391 [www.annualreviews.org](http://www.annualreviews.org)
- 392 27. Mehlhorn H, Walldorf V, Klimpel S, Jahn B, Jaeger F, Eschweiler J, et al. First  
393 occurrence of *Culicoides obsoletus*-transmitted Bluetongue virus epidemic in Central  
394 Europe. *Parasitol Res.* 2007;101(1):219–28.
- 395 28. Meiswinkel R, Van Rijn P, Leijts P, Goffredo M. Potential new *Culicoides* vector of  
396 bluetongue virus in northern Europe. *Veterinary Record.* 2007 Oct 20;161(16):564–5.
- 397 29. Dijkstra E, Van der Ven IJK, Meiswinkel R, Holzel DR, van Rijn PA, Meiswinkel R.  
398 *Culicoides chiopterus* as a potential vector of bluetongue virus in Europe. *Veterinary*  
399 *record.* 2008;422–422.

400

401

402

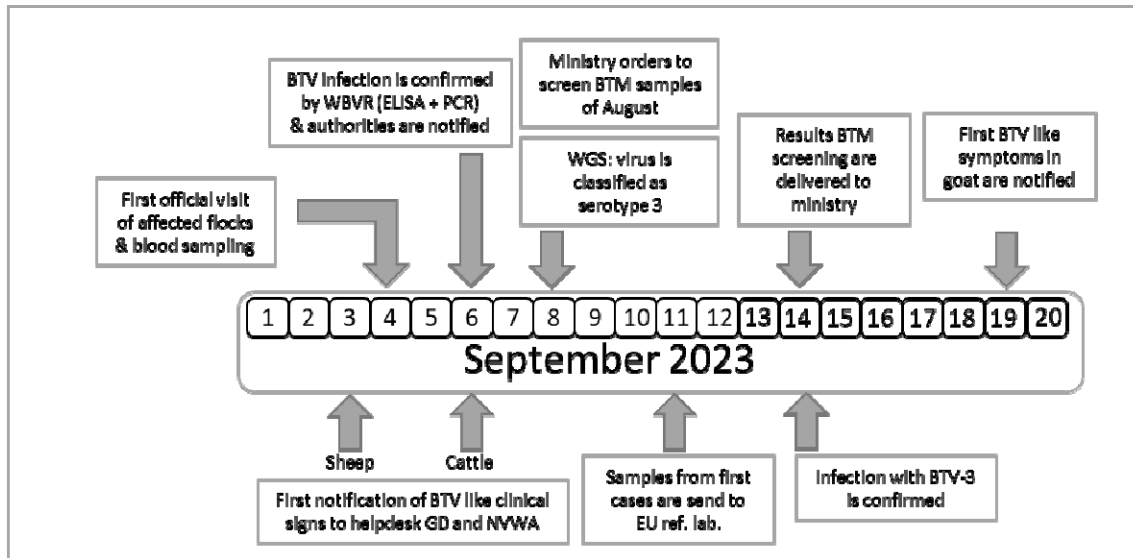

403

404 **Figure 1.** Graphical representation of the timeline of the initial BTV-3 outbreak in the  
405 Netherlands in September 2023. Abbreviations: BTM: bulk tank milk, BTV: Bluetongue  
406 virus, WGS: Whole genome Sequencing.

407



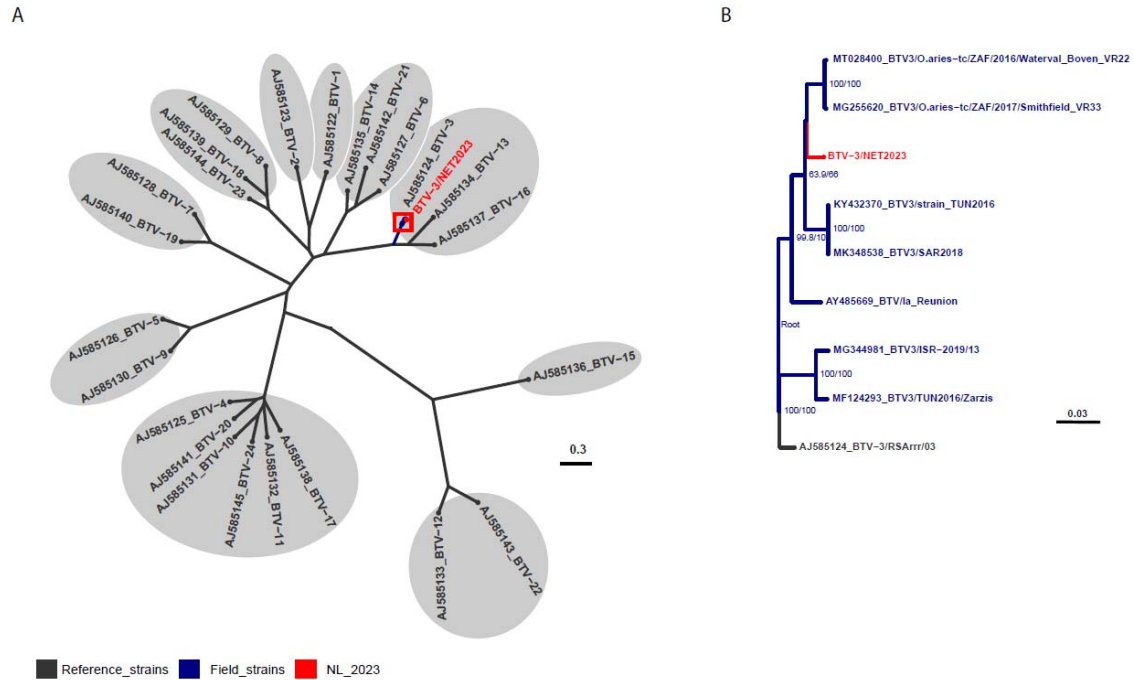

408

409 **Figure 2:** Phylogenetic trees obtained with the Maximum Likelihood method showing (A) the  
410 obtained segment 2 sequence with reference strains from each of the 24 notifiable BTV  
411 serotypes and in detail (B) selected field strains of closely related BTV-3 sequences. Unrooted  
412 trees with UFBoot2 bootstrap values indicated at the nodes, GenBank accession numbers  
413 included in sequence name.

414

415

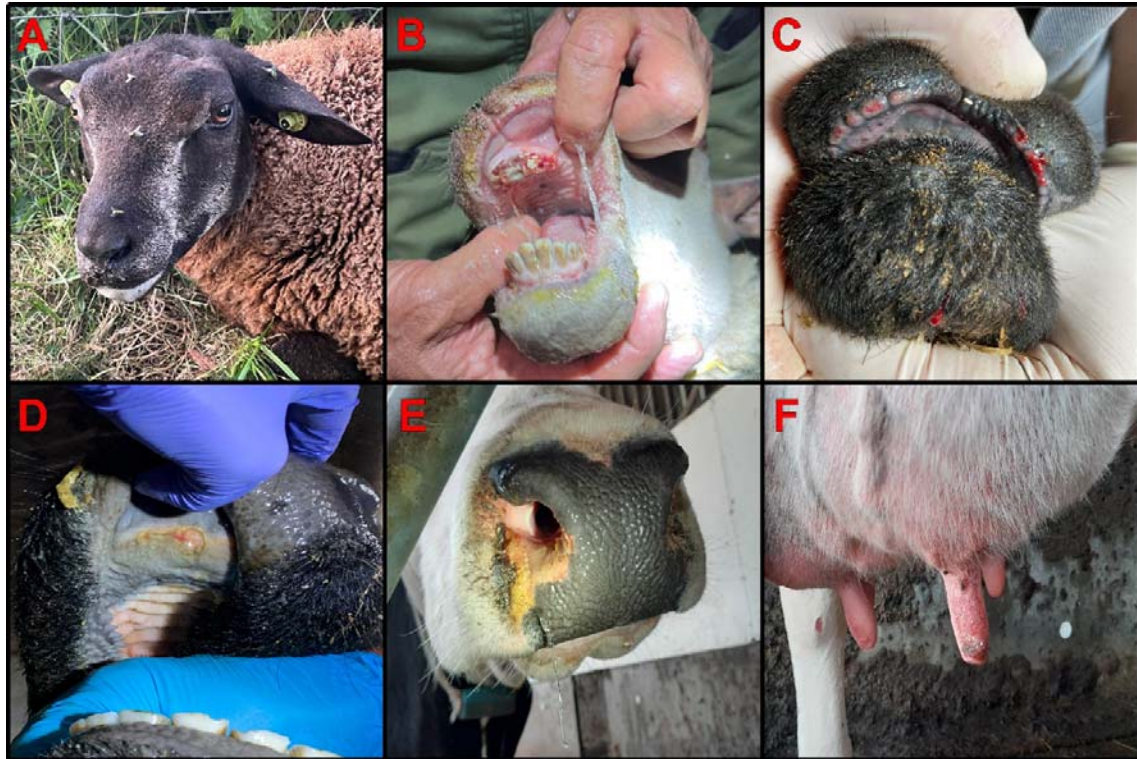

416

417 **Figure 3:** Clinical manifestations of BTV-3/NET2023 in sheep and cattle. (A)  
418 Hypersalivation and (B) erosion of the oral mucosal membranes and (C) bleeding of the lips  
419 are observed in sheep. In cattle are (D) ulceration on the oral mucosal membrane, (E) crust  
420 formation at the nostrils and (F) necrosis of the teats detected.

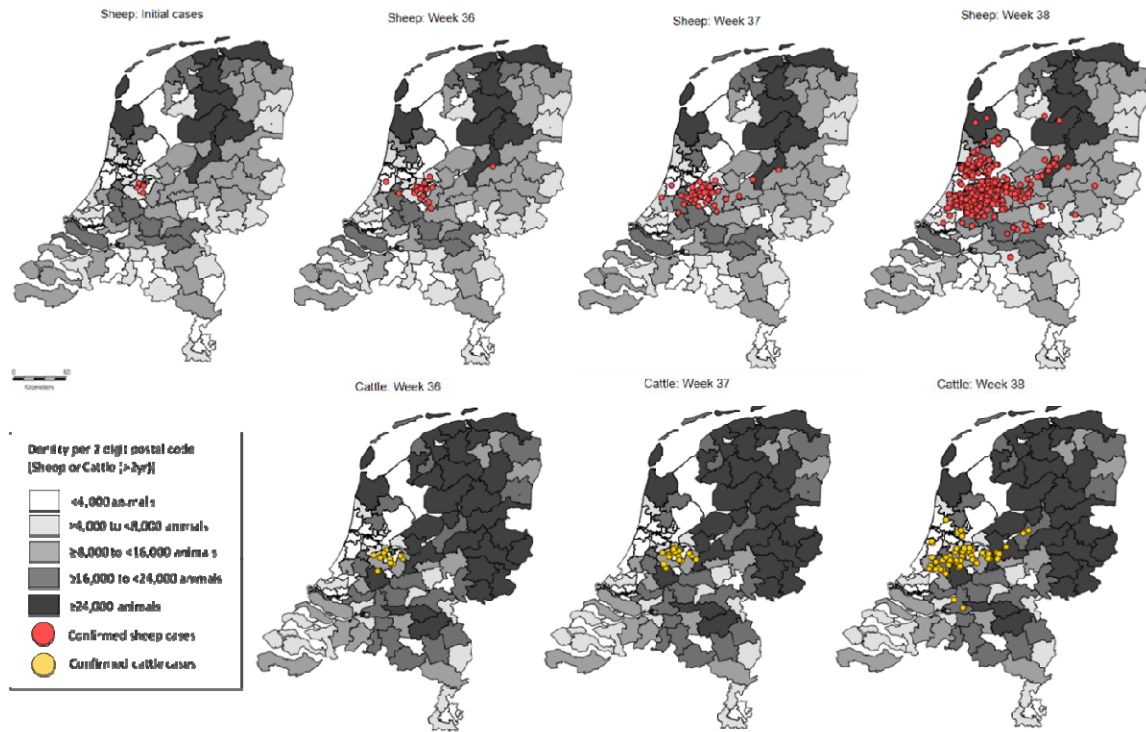

421

422 **Figure 4.** Thematic map of the Netherlands with the number of sheep or cattle density per 2  
423 digit postal code. BTV-confirmed cases of sheep (red dots) and cattle (yellow) of the first  
424 (week 36), second (week 37) and third (week 38) week of the bluetongue serotype 3 outbreak  
425 are also depicted.

426

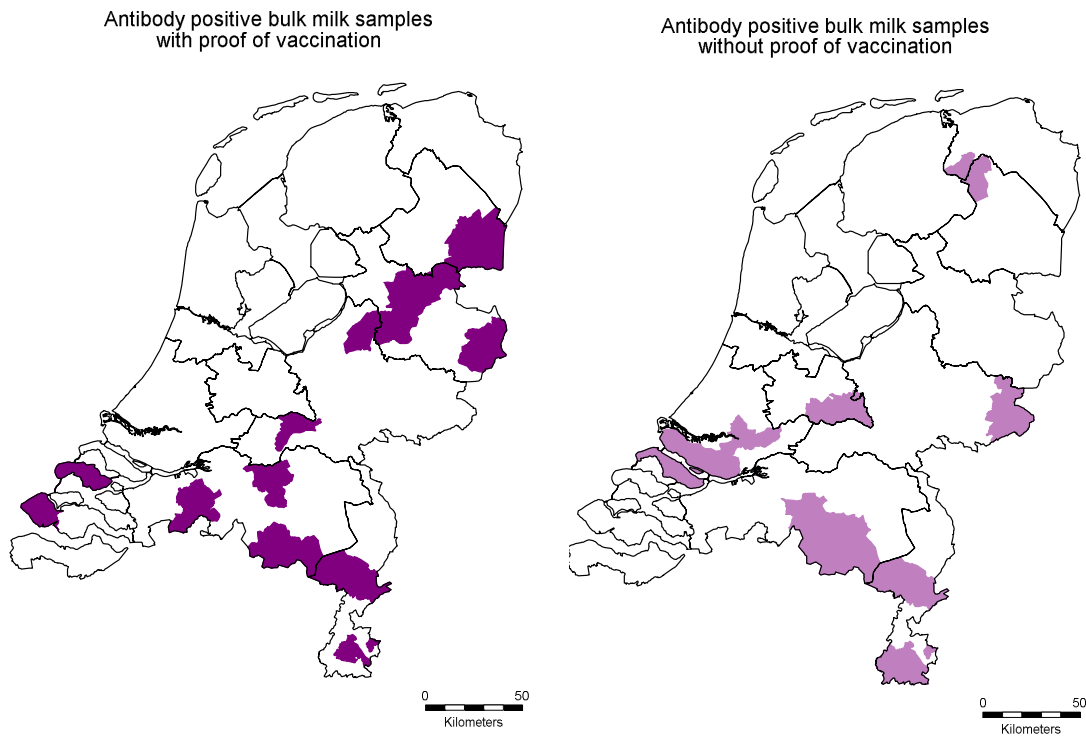

427

428 **Figure 5.** Distribution of location from which the bulk milk samples originated that tested  
429 doubtful or positive for antibodies against BTV, for herds where evidence of vaccination in  
430 the last five years was found (left) or no evidence of vaccination in the most recent five years  
431 was found (right)

432

433 **Table 1:** The average coverage of each specific segment of the three samples that were  
434 subjected to whole genome sequencing.

| Sample   | Ct-value | <i>Average coverage per nucleotide, categorized per segment</i> |       |       |       |       |       |       |       |       |        |
|----------|----------|-----------------------------------------------------------------|-------|-------|-------|-------|-------|-------|-------|-------|--------|
|          |          | Seg 1                                                           | Seg 2 | Seg 3 | Seg 4 | Seg 5 | Seg 6 | Seg 7 | Seg 8 | Seg 9 | Seg 10 |
| 23014055 | 23.3     | 431                                                             | 898   | 548   | 1386  | 642   | 2570  | 664   | 4311  | 1905  | 200    |
| 23014071 | 28.6     | 72                                                              | 112   | 76    | 149   | 99    | 135   | 107   | 223   | 113   | 30     |
| 23014098 | 25.2     | 217                                                             | 313   | 228   | 470   | 192   | 488   | 258   | 630   | 283   | 45     |

435

436

437 **Table 2:** The percentage of homology between BTV-3/NET2023 with the closest isolate,  
438 which is deposited on NCBI.

439

| Genome segment | Virus protein | Highest % identity with BTV-3/NET2023 | Isolate name                                  | Accession number |
|----------------|---------------|---------------------------------------|-----------------------------------------------|------------------|
| Seg-1          | VP1           | 97,69                                 | BTV-8/2020_13                                 | OQ860824.1       |
| Seg-2          | VP2           | 98,09                                 | BTV-3/ZIM2002/01                              | AJ585179.1       |
| Seg-3          | VP3           | 98,3                                  | BTV-5/O.aries-tc/ZAF/2011/Benoni_01012015     | MG255451.1       |
| Seg-4          | VP4           | 98,37                                 | BTV-3/TUN2016/Zarzis                          | MF124295.1       |
| Seg-5          | NS1           | 98,42                                 | BTV-1/ISR-2050/19                             | OM502356.1       |
| Seg-6          | VP5           | 97,5                                  | BTV-3/O.aries-tc/ZAF/2017/Smithfield_VR33     | MG255623.1       |
| Seg-7          | VP7           | 98,27                                 | BTV-3/O.aries-tc/ZAF/2016/Waterval_Boven_VR22 | MT028405.1       |
| Seg-8          | NS2           | 97,69                                 | BTV-2/O.aries-tc/ZAF/2017/Queenstown_VR18     | MG255577.1       |
| Seg-9          | VP6/NS4       | 97,43                                 | BTV-4/SPA2003/03                              | KP821911.1       |
| Seg-10         | NS3/NS3a      | 98,42                                 | BTV-18/BT32/76                                | JX272448.1       |

440

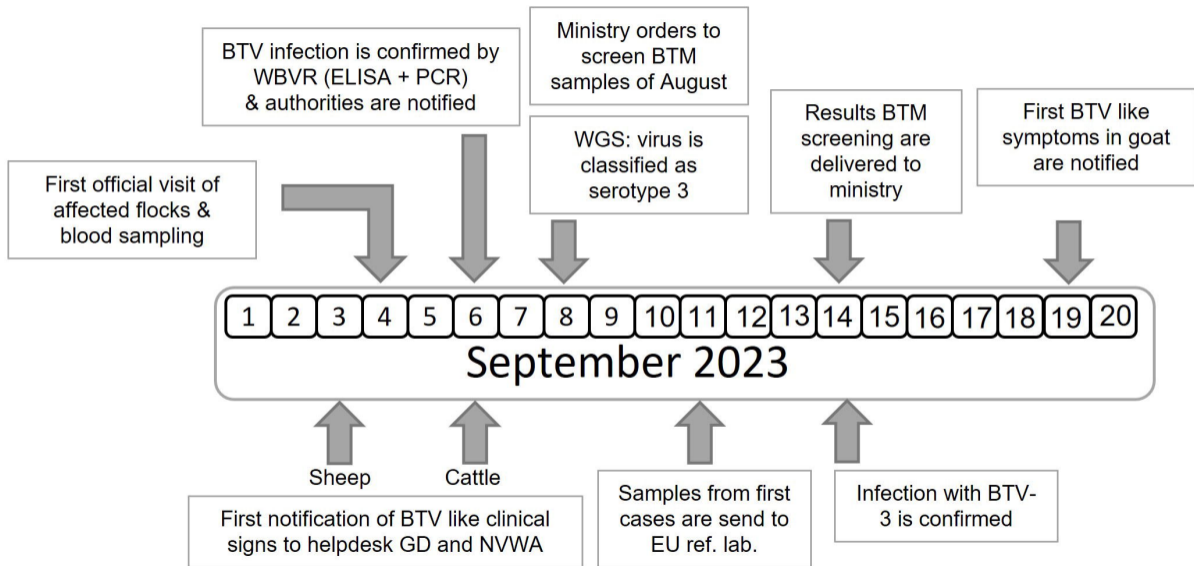

A

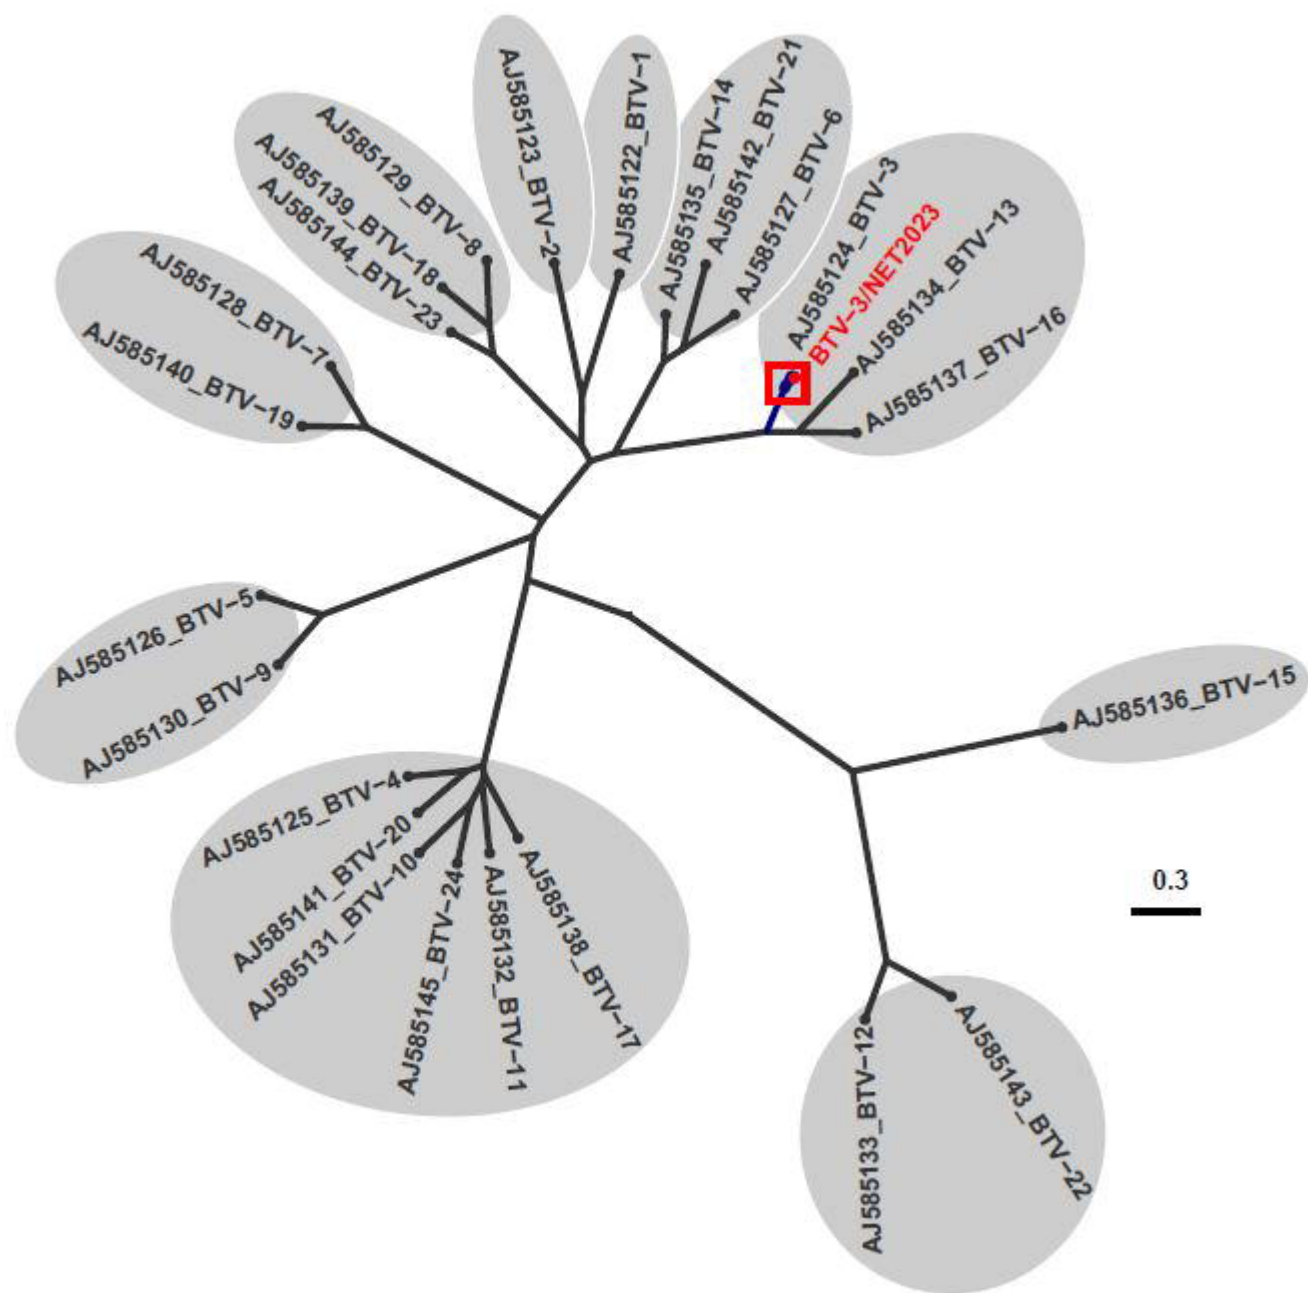

B

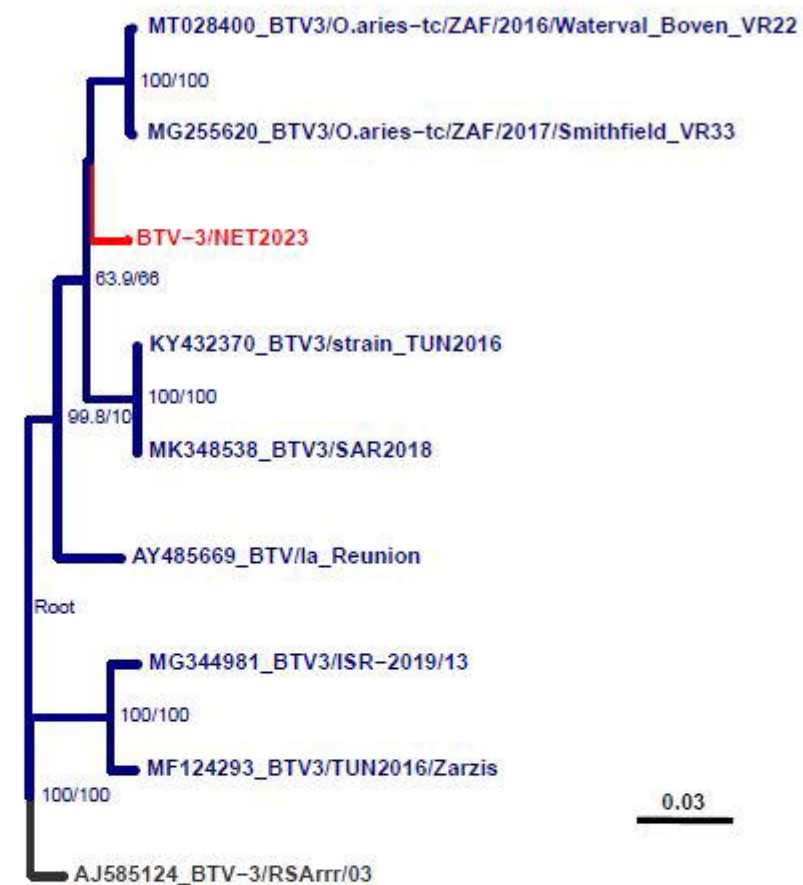

Reference\_strains Field\_strains NL\_2023



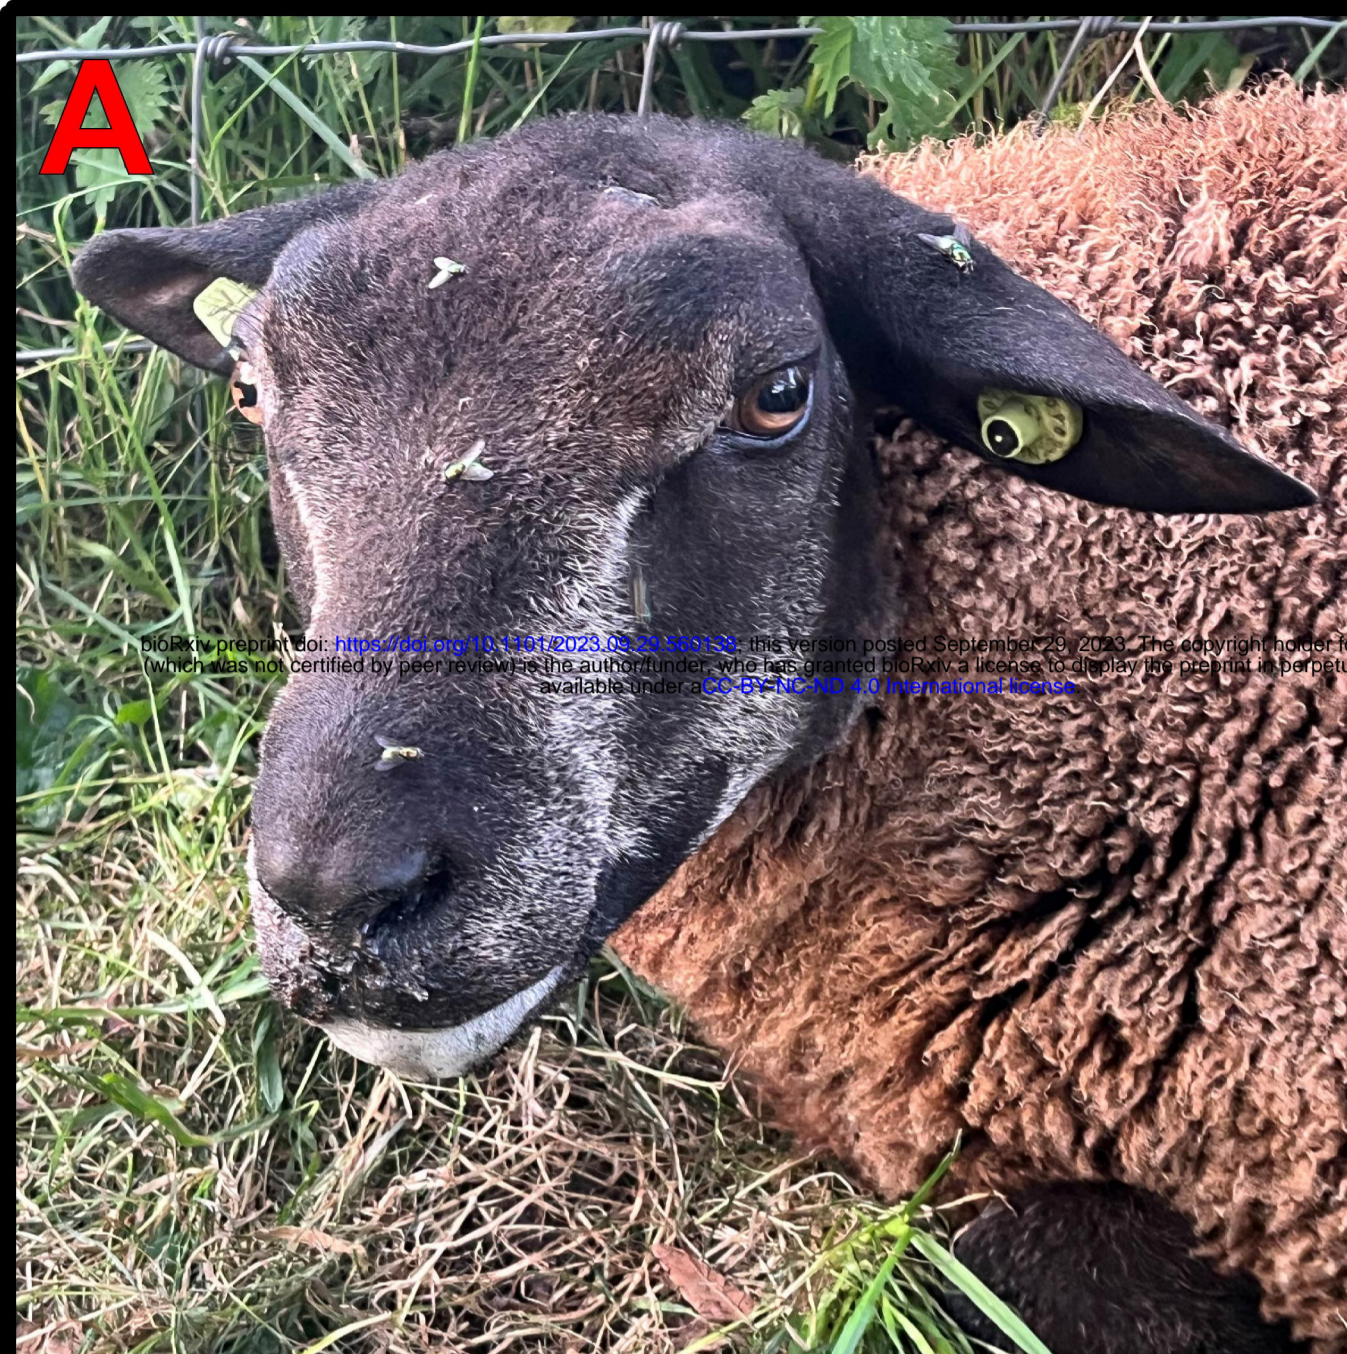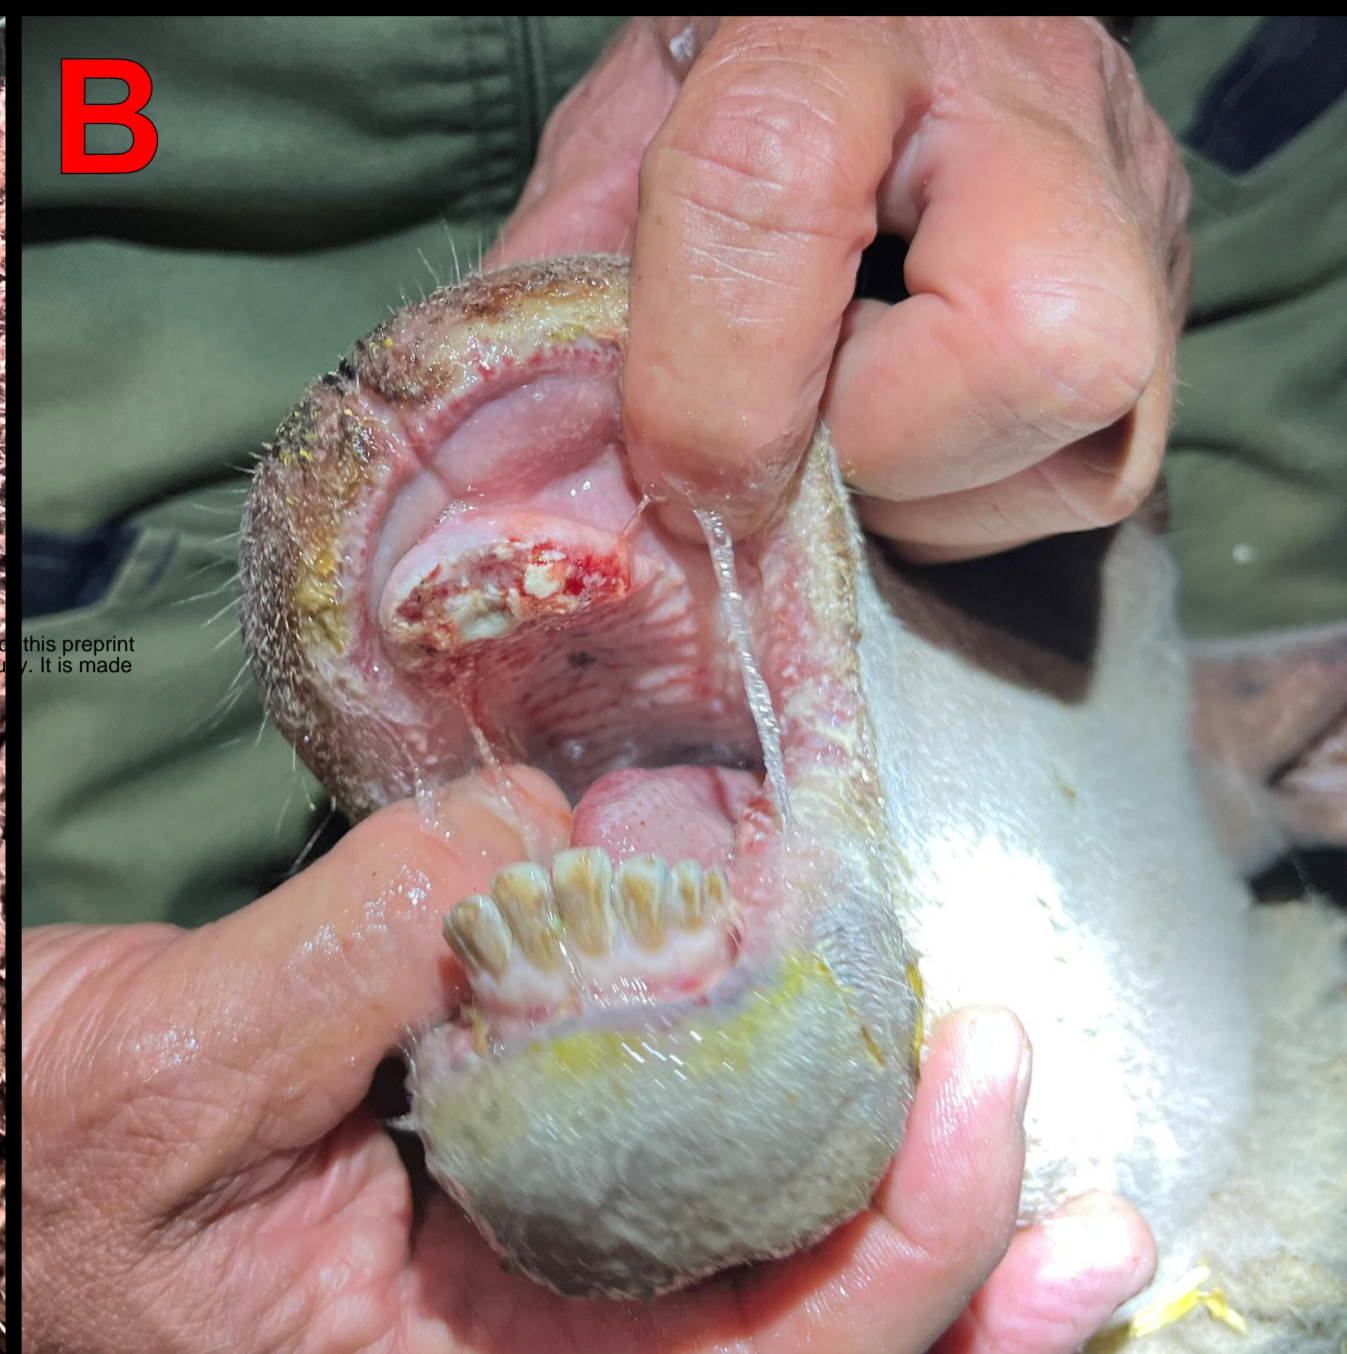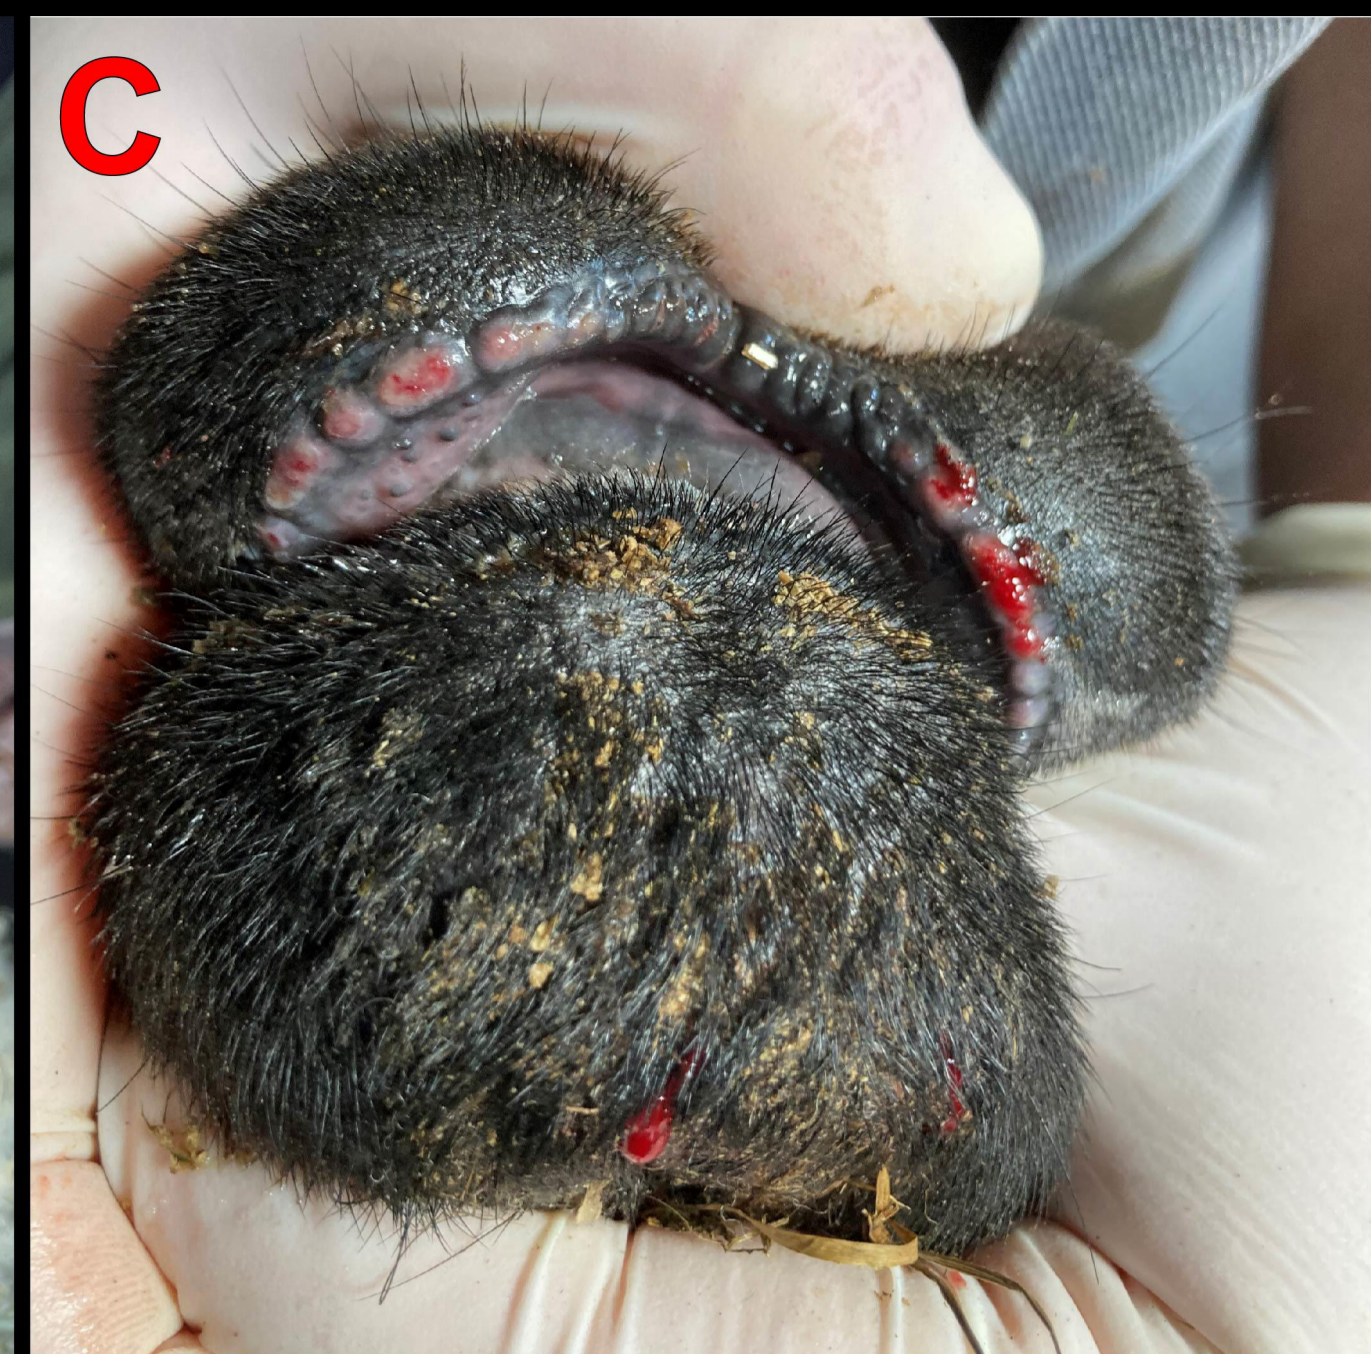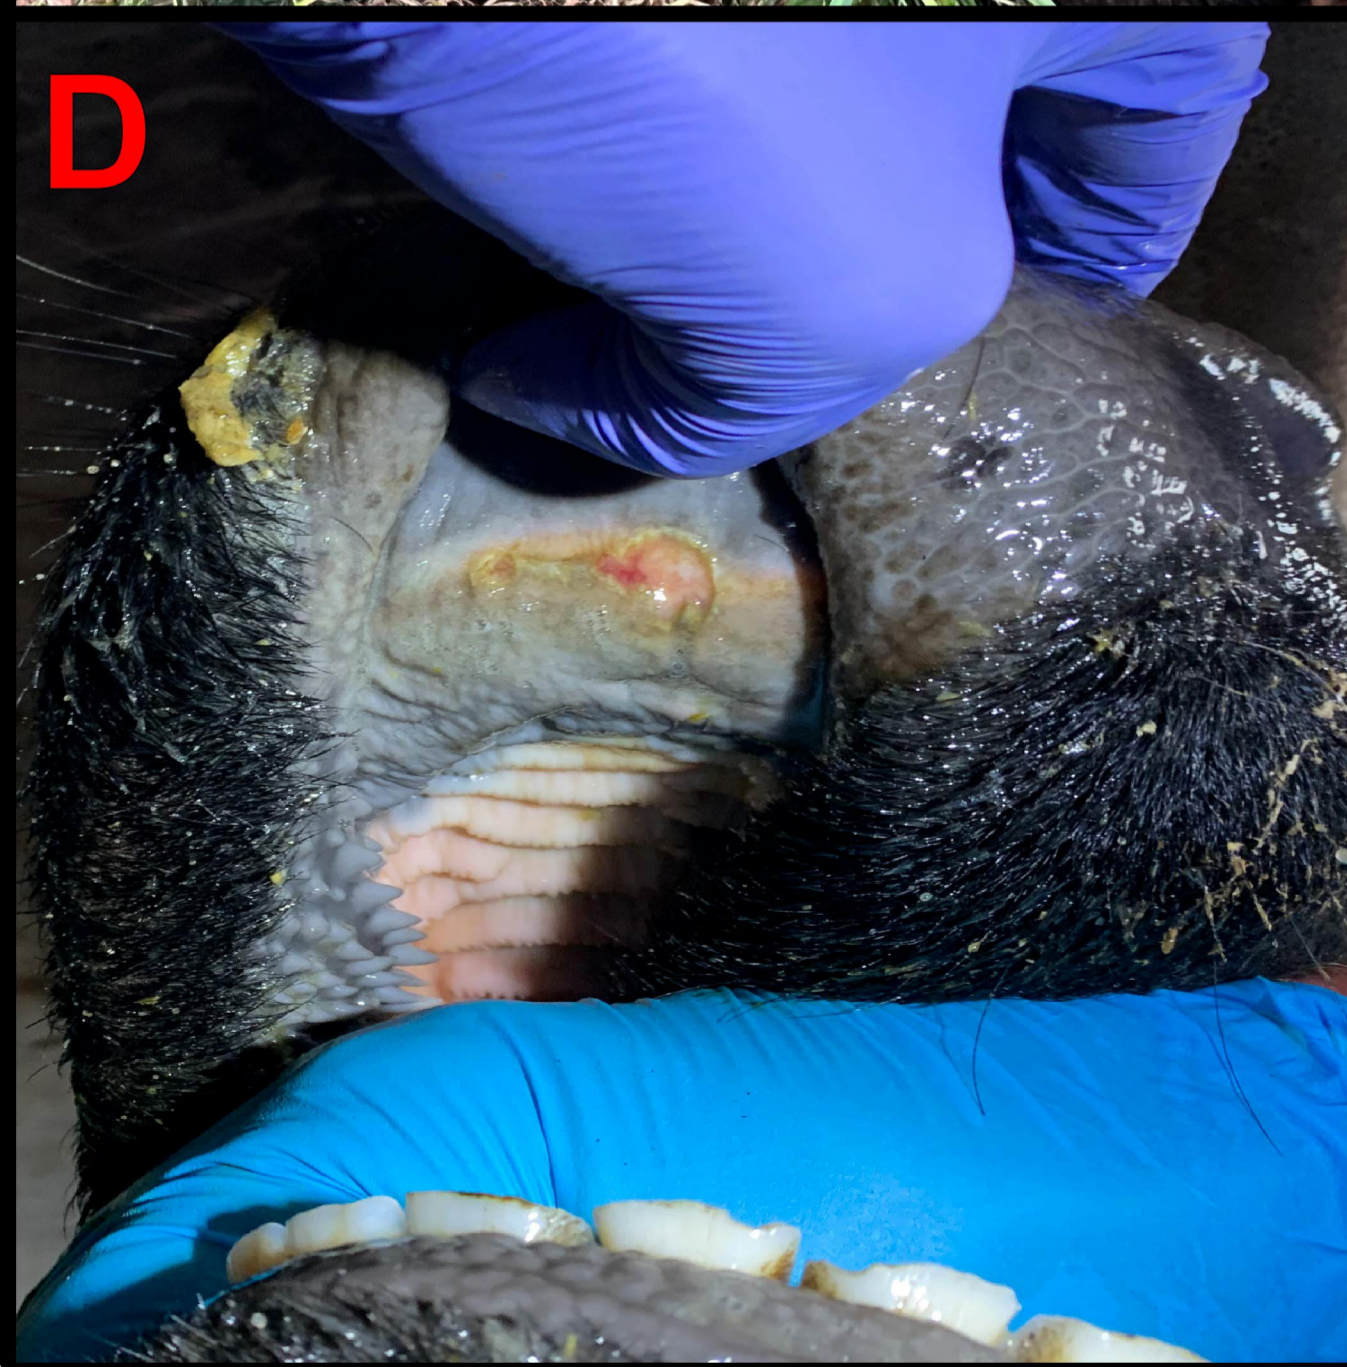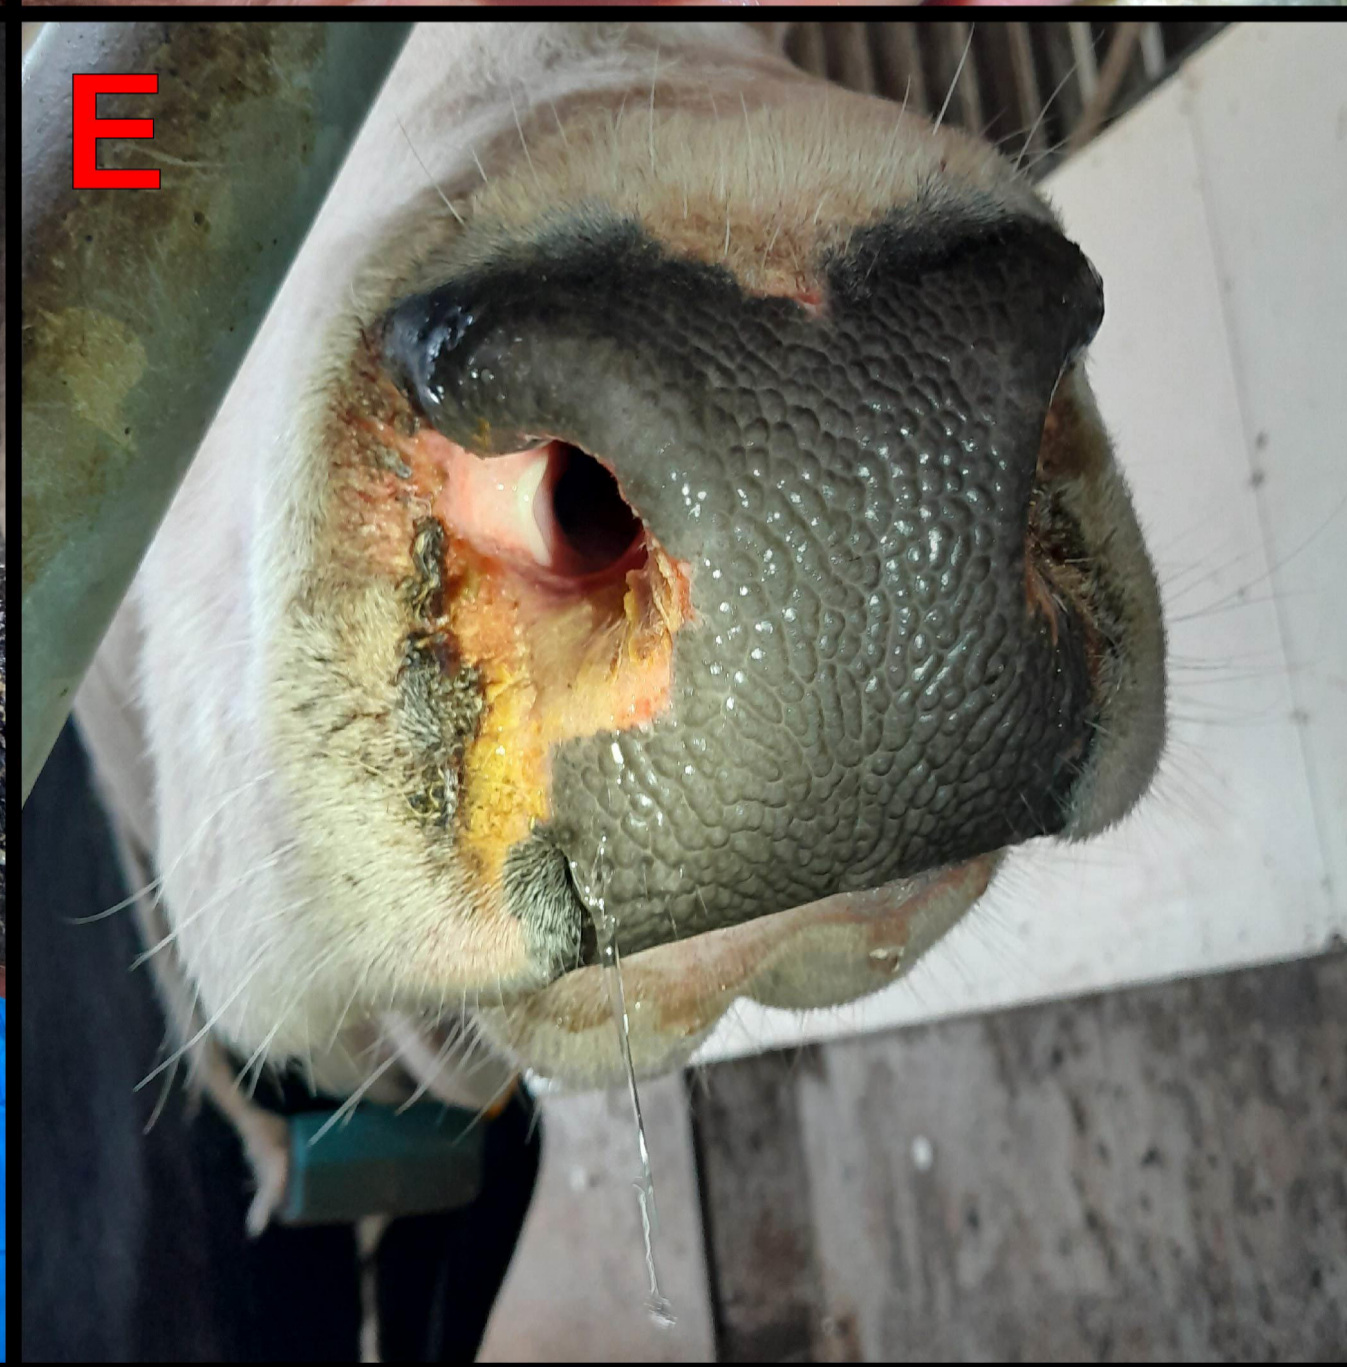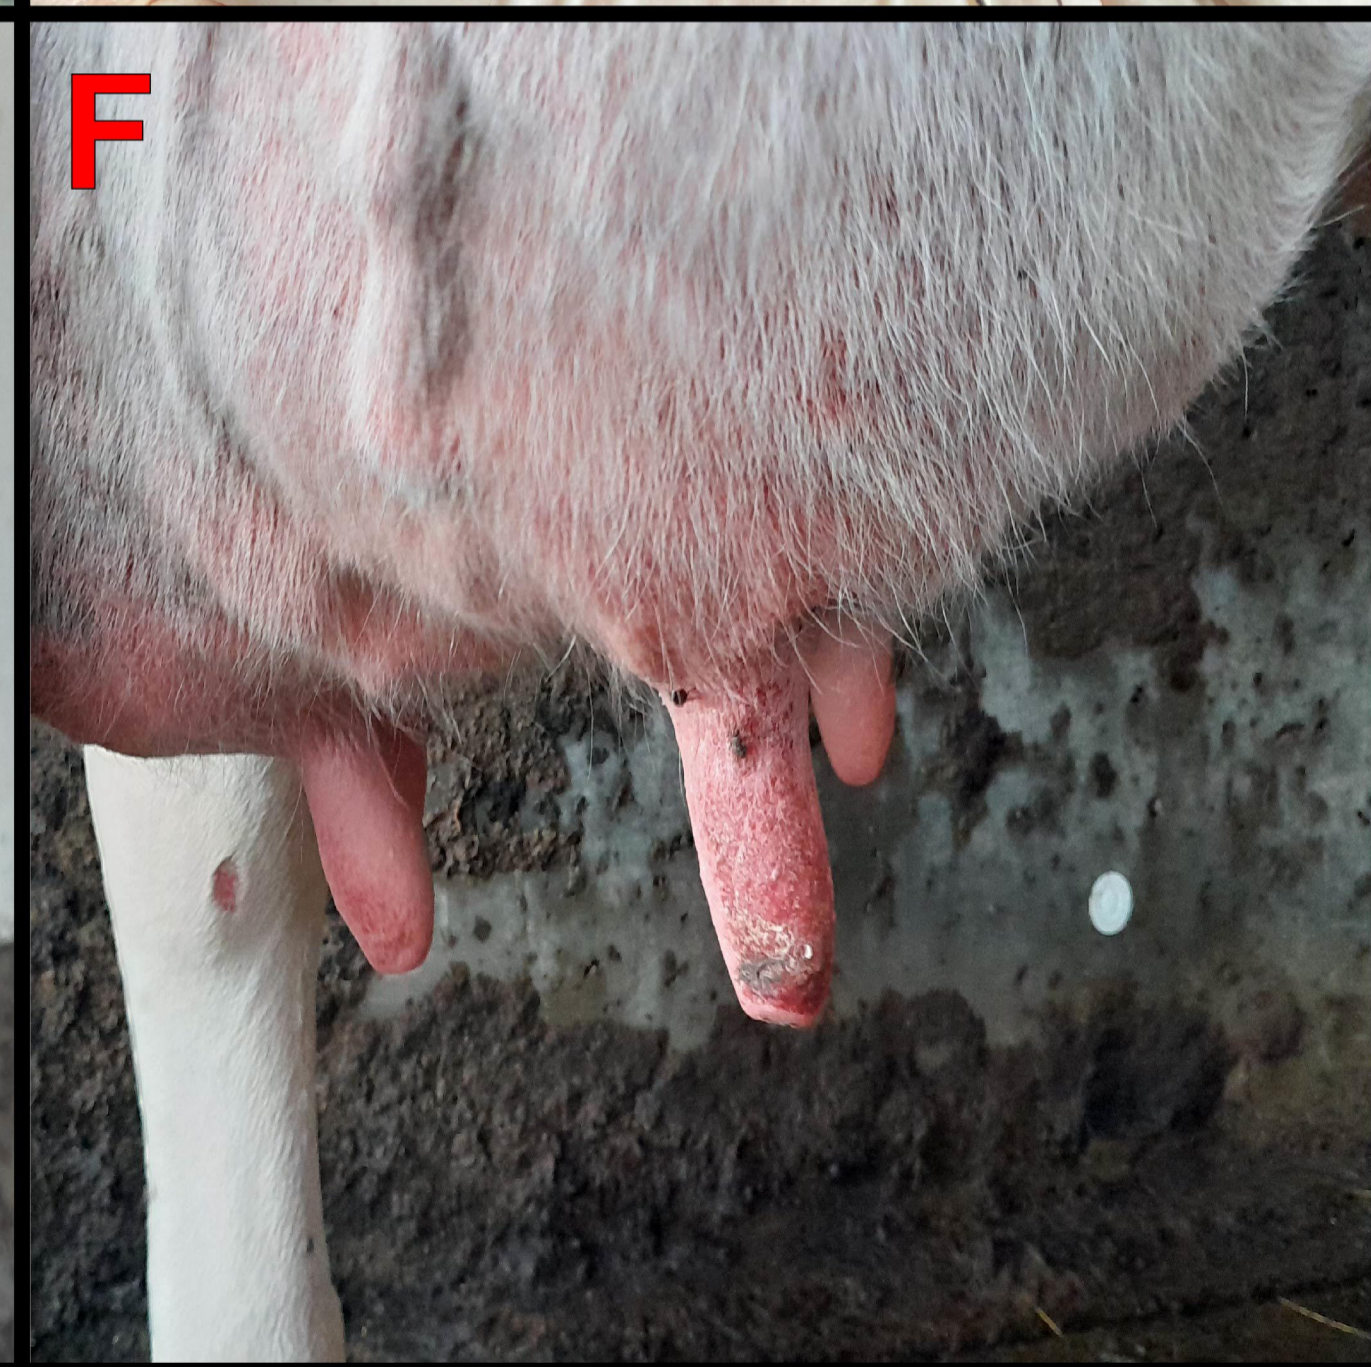

Sheep: Initial cases

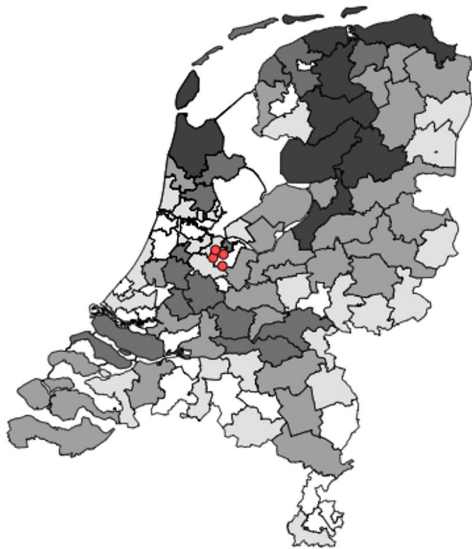

Sheep: Week 36

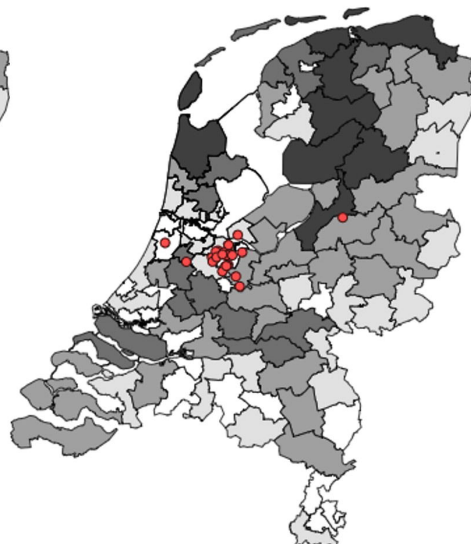

Sheep: Week 37

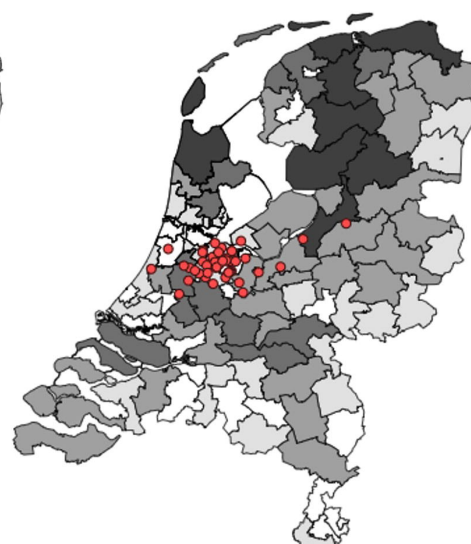

Sheep: Week 38

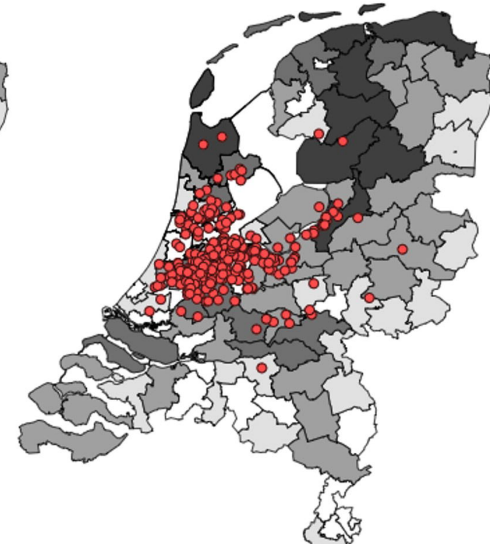

0 50  
Kilometers

Cattle: Week 36

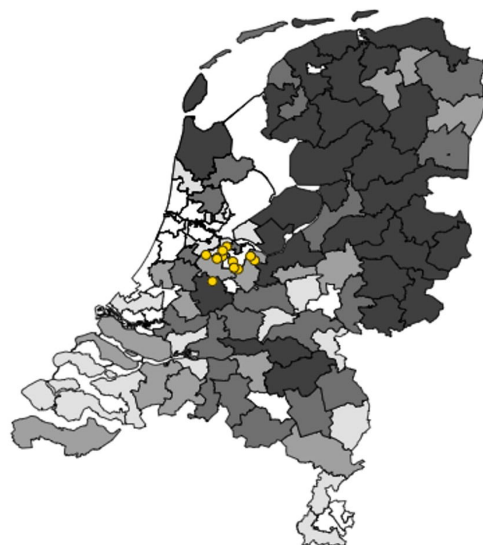

Cattle: Week 37

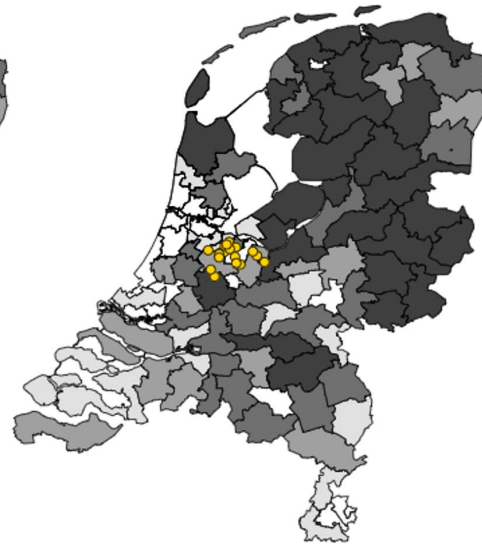

Cattle: Week 38

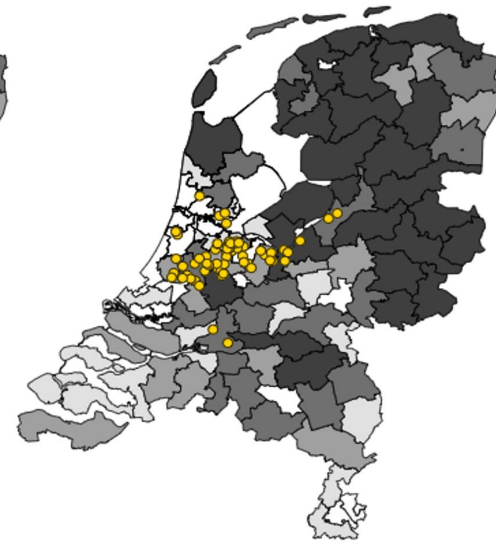

Density per 2 digit postal code  
(Sheep or Cattle (>2yr))

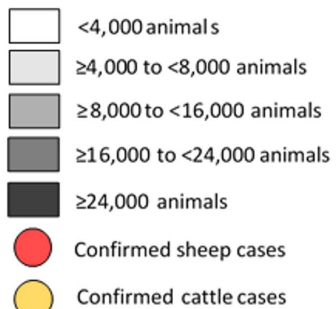

Antibody positive bulk milk samples  
with proof of vaccination

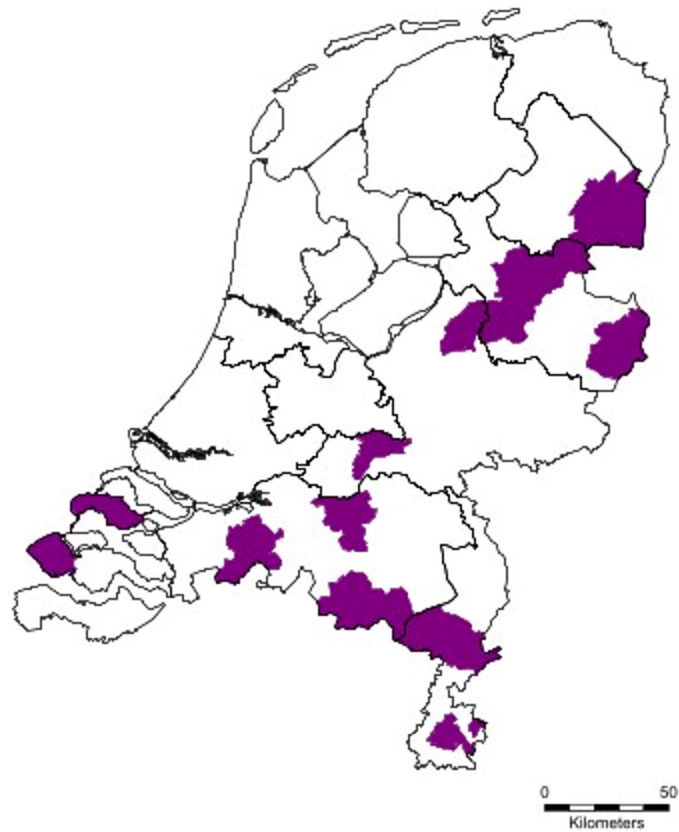

Antibody positive bulk milk samples  
without proof of vaccination

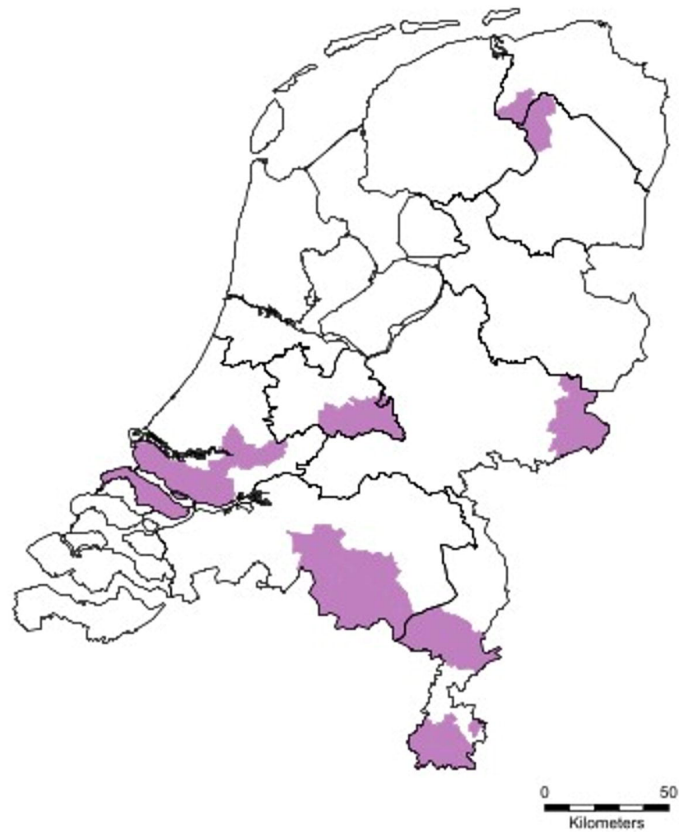

Source: https://www.biorxiv.org/content/10.1101/2023.09.29.560138v1.full.pdf
